# Supplementary material
Source: PubMed Central journal article supplement (PMC3254730)

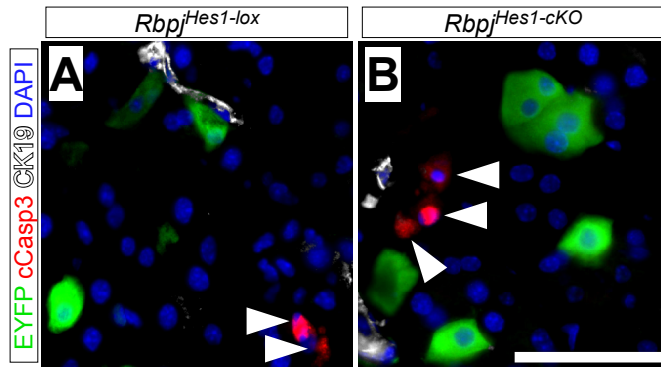

Figure S1

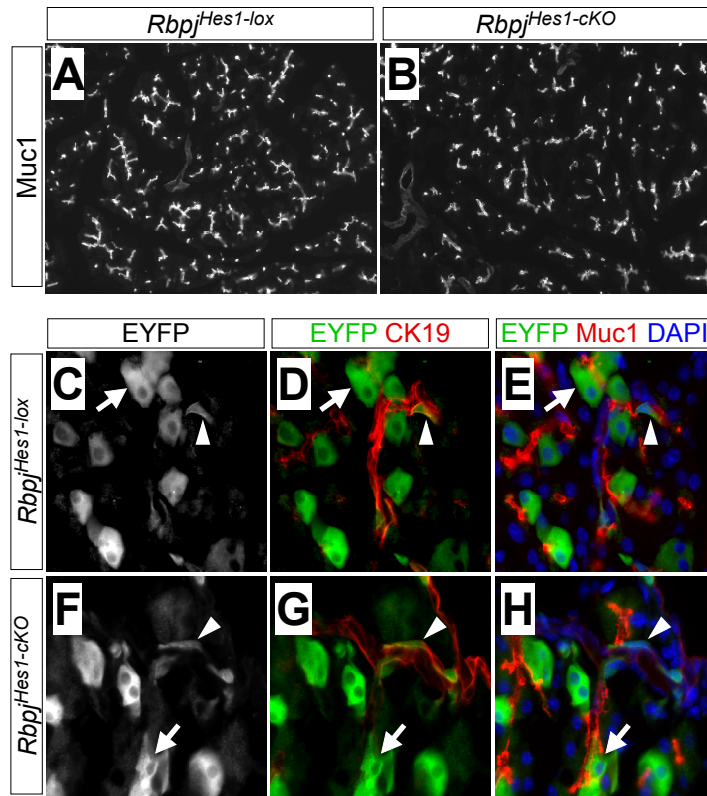

Figure S2

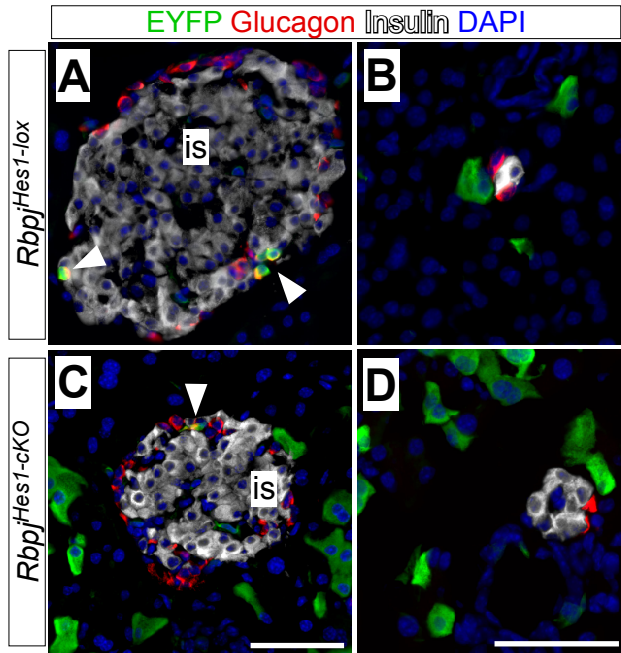

Figure S3

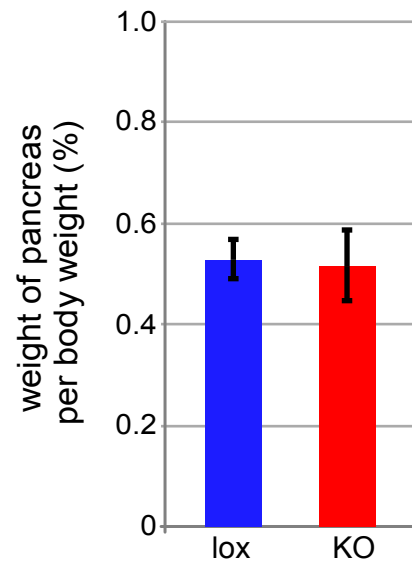

Figure S4

Supplement: NIHMS341172-supplement-03.pdf [file NIHMS341172-supplement-03.pdf]
